# Supplementary material
Source: publisher site journal article supplement (https://www.kjim.org/upload/media/kjim-2022-104-suppl2.pdf)
Supplement: Supplementary file 1 [file kjim-2022-104-suppl2.pdf]

**Supplementary Table 2. The response rate for symptoms at 4 and 7 days after medication**

|                                  | At 4 days after medication | At 7 days after medication |
|----------------------------------|----------------------------|----------------------------|
| DW1601 (n = 67)                  | 52 (78.8)                  | 67 (100)                   |
| DW16011 (n = 70)                 | 41 (60.3)                  | 60 (85.7)                  |
| <i>P. sidoides</i> (n = 64)      | 34 (53.1)                  | 55 (85.9)                  |
| Difference (95% CI) <sup>a</sup> | 18.5 (3.25–33.74)          | 14.3 (6.09–22.48)          |
| Difference (95% CI) <sup>b</sup> | 25.7 (9.95–41.37)          | 14.1 (5.55–22.58)          |
| <i>p</i> value <sup>c</sup>      | 0.020 <sup>a</sup>         | 0.001 <sup>a</sup>         |
| <i>p</i> value <sup>d</sup>      | 0.002 <sup>a</sup>         | 0.002 <sup>a</sup>         |

Values are presented as number (%). The improvement rate for symptoms was defined as total bronchitis severity score (BSS)  $\leq 3$  or reduction of total BSS  $\geq 7$ .

*P. sidoides*, *Pelargonium sidoides*; CI, confidence interval.

<sup>a</sup>The difference was calculated as the value in the DW16011 group minus the value in the DW1601 group.

<sup>b</sup>The difference was calculated as the value in the *P. sidoides* group minus the value in the DW1601 group.

<sup>c</sup>*p* value was calculated using Pearson's chi-square test for the difference of score between DW1601 and DW16011 groups.

<sup>d</sup>*p* value was calculated using Pearson's chi-square test for the difference of score between DW1601 and *P. sidoides* groups.
